## Discrete functions of GSK3 $\alpha$ and GSK3 $\beta$ isoforms in prostate tumor growth and micrometastasis

Fei Gao<sup>1</sup>, Ahmad Al-Azayzih<sup>1,2</sup> and Payaningal R. Somanath<sup>1,3</sup>

<sup>1</sup> Clinical and Experimental Therapeutics, College of Pharmacy, University of Georgia and Charlie Norwood VA Medical Center, Augusta, GA, USA

<sup>2</sup> College of Pharmacy, Jordan University of Science and Technology, Irbid, Jordan

<sup>3</sup> Department of Medicine, Vascular Biology Center and Cancer Center, Georgia Regents University, Augusta, GA, USA

Correspondence to: Payaningal R. Somanath, email: sshenoy@gru.edu

Keywords: GSK3 $\alpha$ , GSK3 $\beta$ , invasion, micrometastasis, prostate cancer

Received: September 24, 2014

Accepted: January 04, 2015

Published: January 21, 2015

This is an open-access article distributed under the terms of the Creative Commons Attribution License, which permits unrestricted use, distribution, and reproduction in any medium, provided the original author and source are credited.

### ABSTRACT

**Isoform specific function of glycogen synthase kinase-3 (GSK3) in cancer is not well defined. We report that silencing of GSK3 $\alpha$ , but not GSK3 $\beta$  expression inhibited proliferation, survival and colony formation by the PC3, DU145 and LNCaP prostate cancer cells, and the growth of PC3 tumor xenografts in athymic nude mice. Silencing of GSK3 $\alpha$ , but not GSK3 $\beta$  resulted in reduced proliferation and enhanced apoptosis in tumor xenografts. ShRNA-mediated knockdown of GSK3 $\alpha$  and GSK3 $\beta$  equally inhibited the ability of prostate cancer cells to migrate and invade the endothelial-barrier *in vitro*, and PC3 cell micrometastasis to lungs *in vivo*. Mechanistically, whereas silencing GSK3 $\alpha$  resulted in increased expression of pro-apoptotic markers cleaved caspase-3 and cleaved caspase-9 in LNCaP, PC3 and DU145 cells, silencing GSK3 $\beta$  resulted in the inhibition of cell scattering, establishment of cell-cell contacts, increased expression and membrane localization of  $\beta$ -catenin, and reduced expression of epithelial to mesenchymal transition (EMT) markers such as Snail and MMP-9. This indicated the specific role of GSK3 $\beta$  in EMT, acquisition of motility and invasive potential. Overall, our data demonstrated the isoform specific role of GSK3 $\alpha$  and GSK3 $\beta$  in prostate cancer cells *in vitro*, and tumor growth and micrometastasis *in vivo*, via distinct molecular and cellular mechanisms.**

### INTRODUCTION

Although glycogen synthase kinase-3 (GSK3) has assumed a very unique place in various signaling pathways, their precise role in various cellular processes still remains unclear. The activity of GSK3 is negatively regulated by protein kinase B also known as Akt [1, 2]. Akt has been implicated in oncogenic transformation, tumor growth and metastasis of various cancers [3, 4]. Since GSK3 activity is inhibited by Akt-mediated phosphorylation at Serine 21 and Serine 9 in two different isoforms namely GSK3 $\alpha$  and GSK3 $\beta$  respectively [5, 6], scientists believed that activation of GSK3 may likely suppress cancer progression. On the contrary, recent reports indicated that inhibition of GSK3 activity has tumor suppressive effect on various cancers [7-12], raising the question how Akt and GSK3 can concurrently

be active in cancers. We recently provided the first evidence that both Akt and GSK3 can be maintained active simultaneously in prostate cancer cells and mouse embryonic fibroblasts via another activating phosphorylation of a tyrosine residue in GSK3 (Tyrosine 216) by Src family of kinases [13]. However, until today precise role of GSK3 in multiple cellular functions and clinical conditions is controversial, and isoform specific functions of GSK3 and their specific downstream targets in various cancers remain unclear.

Isoforms of GSK3 are identical in their kinase domain morphology (98% homology) and *in vitro* substrate specificities [14]. GSK3 $\alpha$  structurally differs from GSK3 $\beta$  by possessing a glycine-rich extension in the N-terminal region and just 36% homology in the C-terminal region [15, 16]. Whereas GSK3 $\beta$  is the most studied and better characterized GSK3 isoform for its predominant

expression in a majority of the cells and tissues [2], and for its specific involvement in the Wnt signaling cascade [17], specific function of GSK3 $\alpha$  is less known. The presence of a glycine rich extension in the N-terminal region and variations in the C-terminal region in GSK3 $\alpha$  suggests its recruitment to protein complexes different from that of GSK3 $\beta$ . The fact that GSK3 $\alpha$  knockout mice are viable [18] and GSK3 $\beta$  knockout mice is embryonically lethal [19] further supports the hypothesis that GSK3 isoforms are not functionally redundant. While GSK3 $\beta$  is ubiquitously expressed, until today, the only cells known to express GSK3 $\alpha$  predominantly as compared to GSK3 $\beta$  are spermatozoa [20]. This decade old study from our laboratory established a link between increased activation and reduced phosphorylation of GSK3 $\alpha$  at serine 21 with increased sperm motility. Since then, there have been no reports indicating the predominant expression of GSK3 $\alpha$  over GSK3 $\beta$  in any tissues, and most of the studies until today were focused on the GSK3 $\beta$  isoform.

Majority of the conclusions on the inhibitory role of GSK3 on various cellular functions came from mere correlative studies based on the assumption that serine phosphorylated GSK3 is functionally inactive. However, several recent studies, including ours indicated that GSK3 inhibition directly impairs the cancer cell function *in vitro*, and growth and metastasis of multiple cancers *in vivo* such as prostate [13], pancreas [9, 10], oral [8], and ovarian [21]. Reports indicated the specific role of GSK3 $\beta$  isoform in pancreatic [7] and non-small cell lung cancer cells [22]. Recently, an elegant study from Albert Baldwin group demonstrated for the first time that GSK3 $\alpha$  plays a predominant role in pancreatic cancer, as compared to GSK3 $\beta$  [10]. In this report, GSK3 $\alpha$  promoted oncogenic K-Ras function in pancreatic cancer cells through stabilization of TGF $\beta$  activated kinase-1 (TAK1) and TAK1 binding partner (TAB) interactions and subsequent NF $\kappa$ B activation [10, 23], suggesting that both these isoforms may have unique roles in various cancers. This advocates that irrespective of its expression levels, GSK3 $\alpha$ , in addition to GSK3 $\beta$  should be taken into confidence while targeting GSK3 for cancer therapy.

Phosphorylation of the androgen receptor (AR) hinge and ligand-binding sites by GSK3 $\beta$  has been reported to inhibit expression of AR gene targets, thus inhibiting androgen-dependent prostate cancer cell proliferation [24, 25]. In contrast, GSK3 $\beta$  also have been implicated in AR gene expression [26]. Another study indicated that ShRNA-mediated knockdown and pharmacological inhibition of GSK3 inhibited AR expression and its transcriptional activity in prostate cancer cells [27]. These reports were very inconclusive to inform us whether it would be beneficial or harmful to target GSK3 for androgen-dependent prostate cancer. We reported the first evidence on the role of GSK3 in advanced, androgen insensitive prostate cancer cells. Pharmacological inhibition or SiRNA-mediated

knockdown of GSK3 inhibited androgen-independent prostate cancer cell function *in vitro* and tumor growth *in vivo* [13]. This was in agreement with the clinical report from human prostate cancer patient tumor tissues indicating increased protein and mRNA expression of GSK3 $\alpha$  starting from the early tumor growth and increased expression of GSK3 $\beta$  specifically in advanced cancers [28]. This suggested distinct roles for GSK3 $\alpha$  and GSK3 $\beta$  in the early and later stages of prostate cancer growth. Interestingly, expressions of both GSK3 isoforms were elevated in advanced prostate cancer tissues further indicating that GSK3 $\alpha$  may also be needed in advanced prostate cancer.

In the current study, we provide the first evidence that the regulation of cell survival, proliferation and rate of tumor growth in early (LNCaP) and advanced prostate cancer (PC3 and DU145) cells are predominantly dependent on GSK3 $\alpha$ . In contrast, the promotion of epithelial to mesenchymal transition (EMT) and acquisition of invasive and metastatic property in advanced prostate cancer cells is more dependent on GSK3 $\beta$ -mediated inhibition of  $\beta$ -catenin expression and destabilization of cell-cell contacts. Since knocking down GSK3 $\alpha$  in prostate cancer cells is much more effective in inhibiting prostate tumor growth and colonization compared to GSK3 $\beta$ , our study reveal that inhibition of GSK3 $\alpha$  or even better, pharmacological inhibition of both GSK3 isoforms will be an effective strategy for prostate cancer therapy.

## RESULTS

### Silencing GSK3 $\alpha$ gene inhibits prostate cancer cell proliferation

In order to determine the isoform specific role of GSK3 in the regulation of prostate cancer cell growth and proliferation, we generated PC3, DU145 and LNCaP stable cell lines expressing ShRNAs for control (non-target), GSK3 $\alpha$  and GSK3 $\beta$  (ShControl, ShGSK3 $\alpha$  and ShGSK3 $\beta$ , respectively). In our analysis, GSK3 $\alpha$  deficient PC3, DU145 and LNCaP cells exhibited reduced cell growth as compared to control, as measured at 36 and 48 hours post plating of equal number of cells in the wells. Although a significant inhibition of cell growth was also observed in GSK3 $\beta$  deficient PC3, DU145 and LNCaP cells, effect was modest when compared to the GSK3 $\alpha$  deficient cells (Figure 1A-C). Our further analysis with MTT confirmed that absence of GSK3 $\alpha$  expression in PC3, DU145 and LNCaP cells significantly inhibit their proliferation (Figure 1D-F). Our results indicated that prostate cancer cell proliferation is predominantly regulated by GSK3 $\alpha$  isoform.

## GSK3 $\alpha$ is necessary for prostate cancer colony formation *in vitro* and well as proliferation and tumor growth *in vivo*

From our *in vitro* studies, we know that silencing GSK3 $\alpha$  predominantly inhibits prostate cancer cell proliferation. In order to determine if this has any effect on the overall tumor growth, we subjected ShControl, ShGSK3 $\alpha$  and ShGSK3 $\beta$  expressing PC3, DU145 and LNCaP cells for colony (foci) formation assay *in vitro* and PC3 cells for tumor xenograft growth *in vivo*. Our analysis indicated that knocking down GSK3 $\alpha$  in PC3, DU145 or LNCaP cells resulted in reduced colony formation *in vitro* (Figure 2A-C). In contrast, PC3, DU145 and LNCaP cells deficient in GSK3 $\beta$  did not show any significant effect on colony formation compared to respective ShControl cells (Figure 2A-C). Similarly, we observed significantly reduced tumor growth in ShGSK3 $\alpha$  PC3

cell tumor xenografts in athymic nude mice as compared to ShControl tumor xenografts (Figure 2D-F). However, no significant difference in the growth of ShGSK3 $\beta$  PC3 tumor xenografts was observed as compared to ShControl PC3 xenografts (Figure 2D-F).

Next, we determined if GSK3 $\alpha$  knockdown also affect tumor cell proliferation *in vivo*. To do this, we performed immunohistochemistry analysis of tumor xenograft frozen sections with proliferation marker Ki67. Our analysis indicated that ShGSK3 $\alpha$  PC3 cell tumor xenografts exhibit reduced number of Ki67 positive (proliferating) cells as compared to ShControl tumor xenografts (Figure 3A and C). However, knocking down GSK3 $\beta$  in PC3 cells did not elicit any effect on the proliferation *in vivo* (Figure 3A and C). Using TUNEL staining, we also determined which GSK3 isoform is involved in the regulation of cell survival and apoptosis in prostate tumor xenografts. Our analysis showed that while knocking down GSK3 $\alpha$  in PC3 cells increased the number

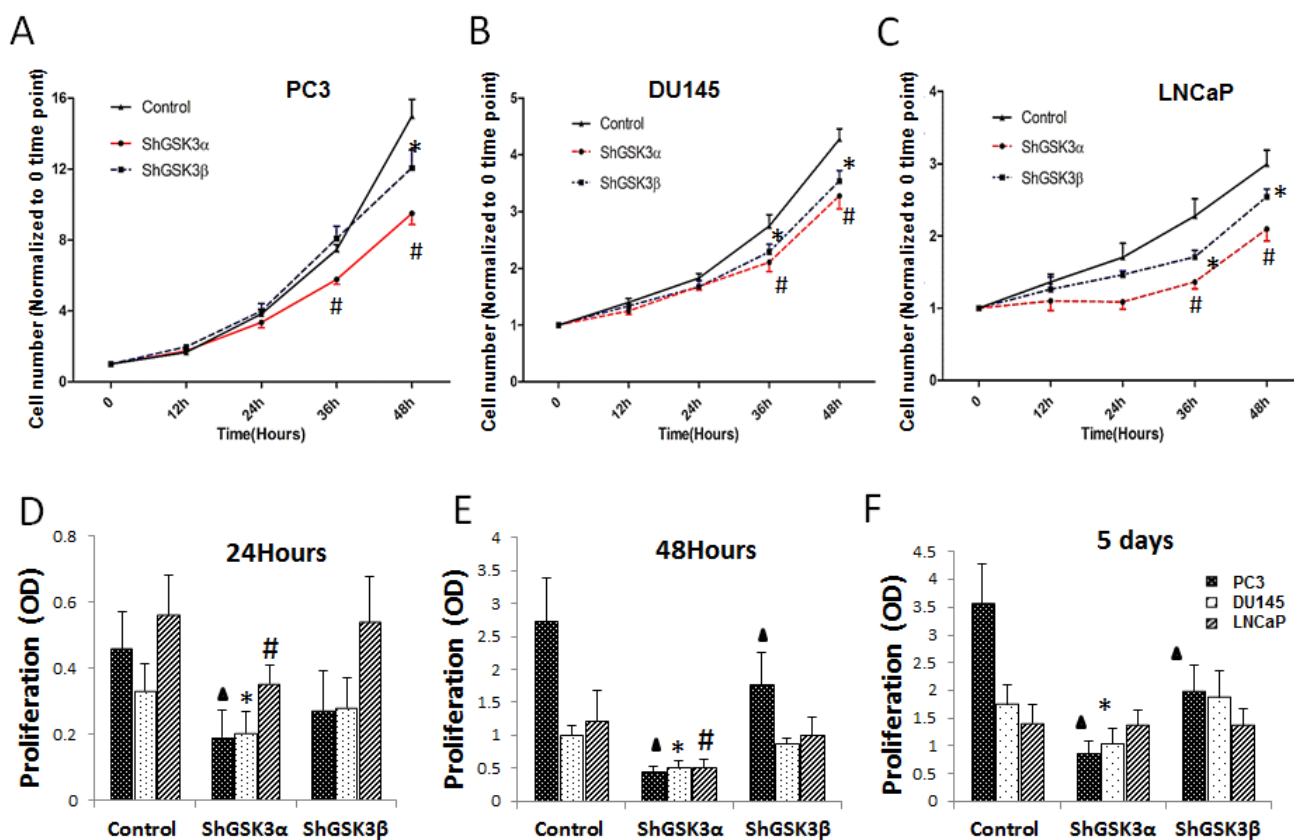

**Figure 1: GSK3 $\alpha$  regulates prostate cancer cell proliferation.** (A) Figure showing PC3 cells stable transfected with ShRNAs for scrambled, GSK3 $\alpha$  and GSK3 $\beta$  via lentiviral infections followed by antibiotic selection plated in 12 well plates and counted at 0, 12, 24, 36 and 48 hours (n=4). (B) Figure showing DU-145 cells stable transfected with ShRNAs for scrambled, GSK3 $\alpha$  and GSK3 $\beta$  plated in 12 well plates and counted at 0, 12, 24, 36 and 48 hours (n=4). (C) Figure showing LNCaP cells stable transfected with ShRNAs for scrambled, GSK3 $\alpha$  and GSK3 $\beta$  plated in 12 well plates and counted at 0, 12, 24, 36 and 48 hours (n=4). (D) Bar graph showing PC3 cells stable transfected with ShRNAs for scrambled, GSK3 $\alpha$  and GSK3 $\beta$  subjected for MTT assay demonstrating the effect of ShRNA-mediated knockdown of GSK3 $\alpha$  and GSK3 $\beta$  on cell proliferation at 12, 24 and 48 hours (n=8). (E) Bar graph showing DU145 cells stable transfected with ShRNAs for scrambled, GSK3 $\alpha$  and GSK3 $\beta$  subjected for MTT assay demonstrating the effect of ShRNA-mediated knockdown of GSK3 $\alpha$  and GSK3 $\beta$  on cell proliferation (n=8). (F) Bar graph showing LNCaP cells stable transfected with ShRNAs for scrambled, GSK3 $\alpha$  and GSK3 $\beta$  subjected for MTT assay demonstrating the effect of ShRNA-mediated knockdown of GSK3 $\alpha$  and GSK3 $\beta$  on cell proliferation (n=8). Data is shown as Mean + SD;  $\Delta$ , \* # p<0.05 for PC3, DU145 and LNCaP cells, respectively.

of TUNEL positive (apoptotic) cells in tumors, knocking down GSK3 $\beta$  did not have any effect on apoptosis as compared to control tumors (Figure 3B and D). Thus, our results demonstrated that GSK3 $\alpha$ , and not GSK3 $\beta$  is necessary for the prostate cancer cell proliferation, survival and colony formation *in vitro* and tumor xenograft growth *in vivo*.

### Silencing either GSK3 $\alpha$ or GSK3 $\beta$ gene inhibits prostate cancer cell motility and microinvasion

Whereas proliferation and cell survival is necessary for the tumor growth, cell motility and invasive ability is crucial for metastasis. Hence, we next determined the

effect of isoform specific knockdown of GSK3 $\alpha$  and GSK3 $\beta$  in prostate cancer cells on their motility and transendothelial migration (microinvasion). The rate of cell motility was determined based on the conventional monolayer scratch recovery assay. For ECIS invasion assay *in vitro*, ShGSK3 $\alpha$  and ShGSK3 $\beta$  PC3 and DU145 cells were introduced on top of human microvascular endothelial cell (HMEC) monolayer and the changes in electrical resistance offered by the cell-barrier were measured by the automated reader through the gold-plated electrodes connecting array chips with the ECIS equipment [13]. Our data indicated that silencing either GSK3 $\alpha$  or GSK3 $\beta$  in PC3 or DU145 cells inhibited cell motility as evidenced by the impaired scratch recovery (Figure 4A and B), and impaired microinvasion by PC3,

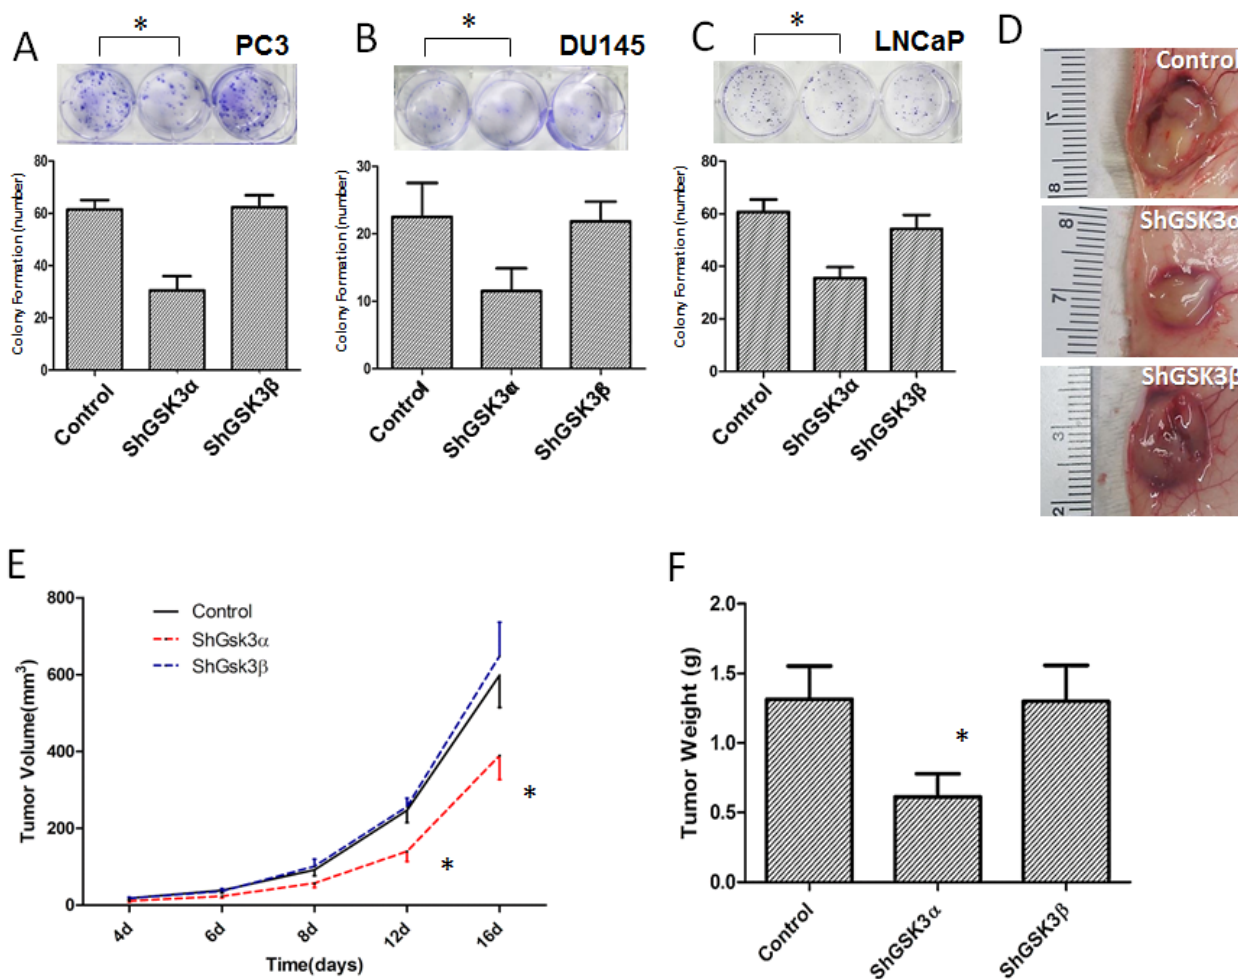

**Figure 2: GSK3 $\alpha$ , but not GSK3 $\beta$  is necessary for prostate cancer cell colony formation *in vitro* and tumor growth *in vivo*.** (A) Figure (upper panel) and bar graph (lower panel) showing colony formation of PC3 cells with stable knockdown of GSK3 $\alpha$  and GSK3 $\beta$ , compared to PC3 cells expressing control ShRNA (n=4). (B) Figure (upper panel) and bar graph (lower panel) showing colony formation of DU145 cells with stable knockdown of GSK3 $\alpha$  and GSK3 $\beta$ , compared to PC3 cells expressing control ShRNA (n=4). (C) Figure (upper panel) and bar graph (lower panel) showing colony formation of DU145 cells with stable knockdown of GSK3 $\alpha$  and GSK3 $\beta$ , compared to PC3 cells expressing control ShRNA (n=4). (D) Images of PC3 cell tumor xenografts collected from athymic nude mice with cells expressing control (upper), GSK3 $\alpha$  (middle) and GSK3 $\beta$  (lower) ShRNAs. (E) Figure showing tumor volume of the PC3 xenografts in athymic nude mice expressing control, GSK3 $\alpha$  and GSK3 $\beta$  ShRNAs on day 4, 6, 8, 12 and 16 after injection (n=6). (F) Bar graph showing tumor weight of the PC3 xenografts in athymic nude mice expressing control, GSK3 $\alpha$  and GSK3 $\beta$  ShRNAs collected on day 16 after injection (n=6). Data is shown as Mean + SD; \* $p$  < 0.05.

DU145 and LNCaP cells as measured by the increased HMEC-barrier resistance (Figure 4C-E). Interestingly, on both occasions, effect of GSK3 $\alpha$  knockdown was predominant over GSK3 $\beta$  (Figure 4A-D). Together, these results indicated that both GSK3 $\alpha$  and GSK3 $\beta$  isoforms are necessary for the prostate cancer cell motility and invasion.

### Silencing either GSK3 $\alpha$ or GSK3 $\beta$ gene inhibits prostate cancer colonization in lungs

Next, we determined if silencing either of the GSK3 isoforms will have any effect on metastasis *in vivo*. To do this, we used a modified method of the previously developed lung micrometastasis model mice [29]. Our *in*

*in vivo* data on lung colonization in athymic nude mice of ShControl, ShGSK3 $\alpha$  and ShGSK3 $\beta$  PC3 cells was highly in agreement with our *in vitro* data on the effect of GSK3 isoforms on cell motility and transendothelial migration. Whereas silencing of either ShGSK3 $\alpha$  or ShGSK3 $\beta$  in PC3 cells impaired colonization to lungs in athymic nude mice compared to ShControl, the effect of silencing ShGSK3 $\alpha$  was more effective than silencing ShGSK3 $\beta$  in PC3 cells (Figure 5A and B). In order to confirm this further, we subjected the mice lungs for serial section analysis to determine the extent of colonization of PC3 cells. Our analysis showed that both ShGSK3 $\alpha$  and ShGSK3 $\beta$  gene knockdown resulted in impaired colonization of PC3 cells to the mice lungs (Figure 6A-C). Thus, our results demonstrate the importance of ShGSK3 $\alpha$  and ShGSK3 $\beta$  isoforms in prostate cancer invasion and micrometastasis.

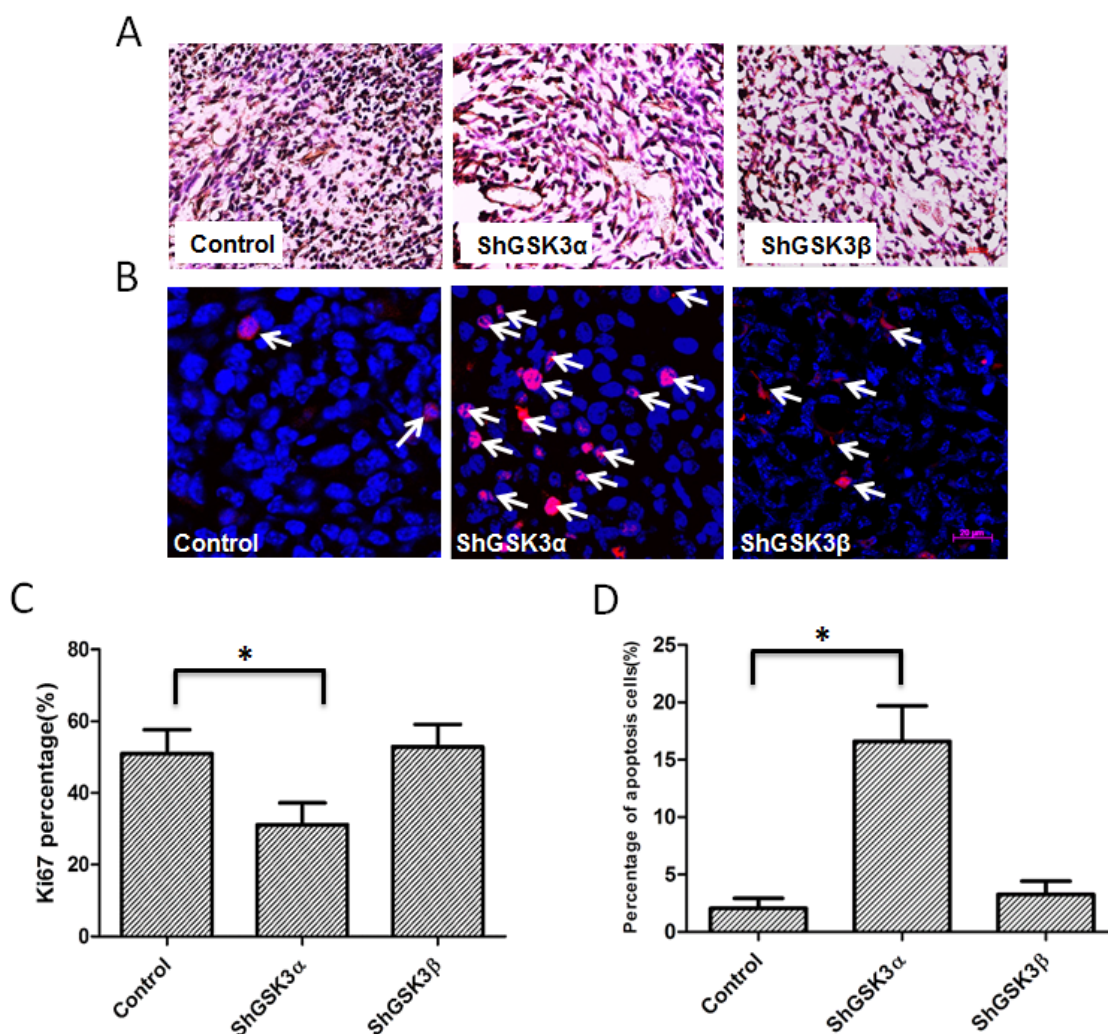

**Figure 3: GSK3 $\alpha$ , but not GSK3 $\beta$  regulates cell survival and proliferation of PC3 cells in athymic nude mice tumor xenografts.** (A) Microscopic images of control, GSK3 $\alpha$  and GSK3 $\beta$  ShRNA expressing PC3 tumor xenograft sections subjected for ki67 staining showing proliferating cells. (B) Fluorescent microscopic images of control, GSK3 $\alpha$  and GSK3 $\beta$  ShRNA expressing PC3 tumor xenograft sections subjected for TUNEL assay showing apoptotic cells. (C) Bar graph showing percentage of proliferating PC3 cells in tumor xenografts transfected with control, GSK3 $\alpha$  and GSK3 $\beta$  ShRNA, normalized to the total number of cells (n=6). (D) Bar graph showing percentage of apoptotic cells in PC3 cells in tumor xenografts transfected with control, GSK3 $\alpha$  and GSK3 $\beta$  ShRNA, normalized to the number of nuclei (n=6). Data is shown as Mean + SD; \* $p < 0.05$ .

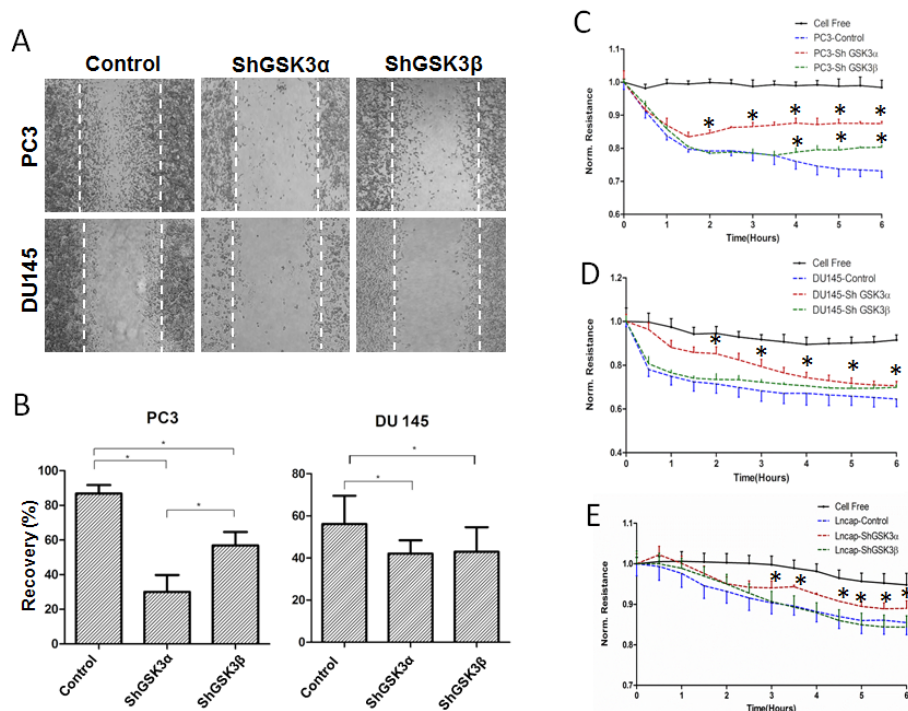

**Figure 4: Reduced GSK3 $\alpha$  or GSK3 $\beta$  expression leads to inhibition of prostate cancer cell motility and microinvasion *in vitro*.** (A) Microscopic images of PC3 (upper panel) and DU145 (lower panel) cell monolayer scratches expressing control, GSK3 $\alpha$  and GSK3 $\beta$  ShRNA, 12 hours after creation of scratches showing the effect of GSK3 $\alpha$  and GSK3 $\beta$  knockdown on prostate cancer cell motility. (B) Bar graph showing the ability of control, GSK3 $\alpha$  and GSK3 $\beta$  ShRNA expressing PC3 and DU145 cells to migrate and recover the wound (by filling the scratch area) (n=6). (C) Figure showing the ability of control, GSK3 $\alpha$  and GSK3 $\beta$  ShRNA expressing PC3 cells to migrate through the endothelial monolayer (microinvasion) as measured using the electric cell-substrate impedance sensing technology (n=4). (D) Figure showing the ability of control, GSK3 $\alpha$  and GSK3 $\beta$  ShRNA expressing DU145 cells to migrate through the endothelial monolayer (n=4). (E) Figure showing the ability of control, GSK3 $\alpha$  and GSK3 $\beta$  ShRNA expressing LNCaP cells to migrate through the endothelial monolayer (n=4). Data is shown as Mean + SD; \* $p < 0.05$ .

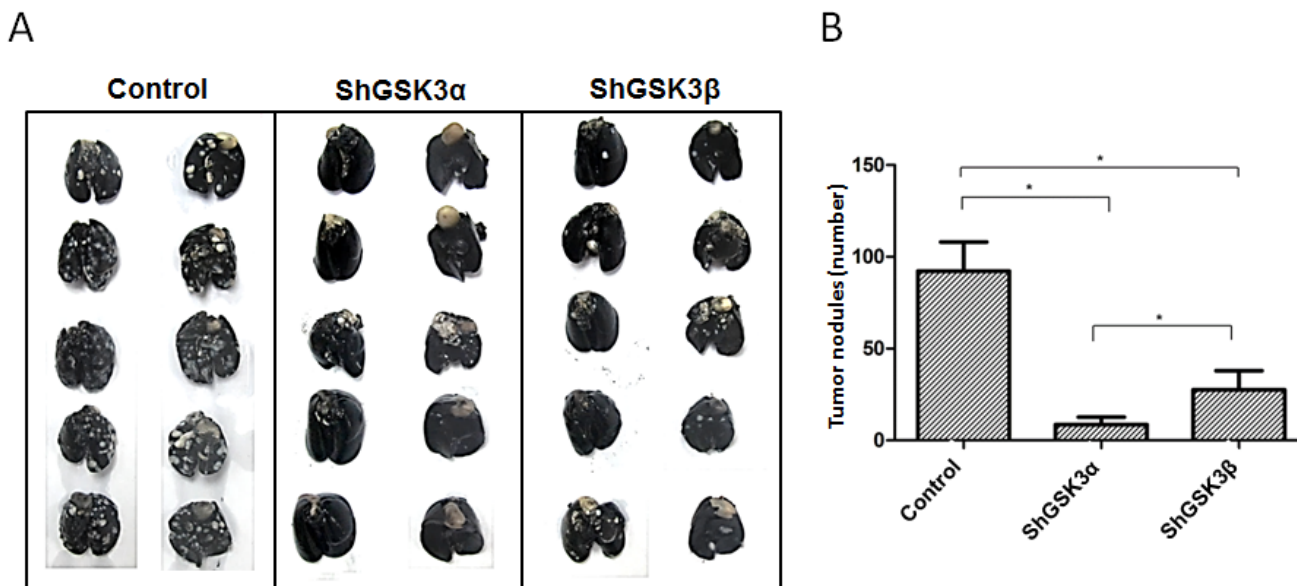

**Figure 5: ShRNA-mediated silencing of both GSK3 $\alpha$  and GSK3 $\beta$  gene expression inhibited prostate cancer colonization to lungs.** (A) Figure showing the lungs collected from athymic nude mice 16 days after intravenous (tail-vein) administration of PC3 cells expressing control, GSK3 $\alpha$  and GSK3 $\beta$  ShRNA and perfused with india ink to visualize the metastatic tumor nodules. (B) Bar graph showing the number of tumor nodules quantified from the external surface of athymic nude mice lungs collected 16 days after intravenous administration of PC3 cells expressing control, GSK3 $\alpha$  and GSK3 $\beta$  ShRNA showing the effect of GSK3 $\alpha$  and GSK3 $\beta$  gene knockdown on their ability to metastasize to the lungs (n=5). Data is shown as Mean + SD; \* $p < 0.05$ .

## GSK3 $\alpha$ and GSK3 $\beta$ specifically mediate prostate cancer cell intrinsic survival pathway and epithelial-to-mesenchymal transition (EMT), respectively

Cell based assays indicated a predominant effect of GSK3 $\alpha$  knockdown in prostate cancer cells on cell survival, proliferation and tumor growth with only a modest or no effect of GSK3 $\beta$  knockdown on these cell functions. However, the observed functional overlap between GSK3 $\alpha$  and GSK3 $\beta$  gene silencing on cell motility, invasion and micrometastasis *in vivo* questioned if prostate cancer metastasis is a redundant function of both the GSK3 isoforms. To address this, we determined the effect of isoform specific knockdown of GSK3 $\alpha$  and GSK3 $\beta$  on cellular pathways regulating cell survival as well as cell motility and invasion. Western analysis of ShControl, ShGSK3 $\alpha$  and ShGSK3 $\beta$  revealed that

silencing GSK3 $\alpha$ , but not GSK3 $\beta$  results in increased expression of pro-apoptotic cleaved caspase-9 and cleaved caspase-3 in all the three prostate cancer cell lines (Figure 7A and B), thus indicating the GSK3 $\alpha$  is directly involved in the intrinsic pro-survival pathway in prostate cancer cells.

On the other end, cellular processes such as epithelial-to-mesenchymal transition (EMT), cell motility, transendothelial migration and invasion are essential for the cancer metastasis. Our Western analysis of ShControl, ShGSK3 $\alpha$  and ShGSK3 $\beta$  PC3, DU145 and LNCaP cells revealed that silencing GSK3 $\beta$ , but not GSK3 $\alpha$  results in decreased expression of pro-EMT gene Snail associated with increased expression Wnt signaling mediator  $\beta$ catenin (Figure 8A and C). Interestingly, reduced expression of some of the mediators of EMT and invasion such as N-cadherin (not detected in LNCaP cells) and matrix metalloprotease-9 (MMP9) were noticed with silencing of either of the GSK3 isoforms (Figure 8A and

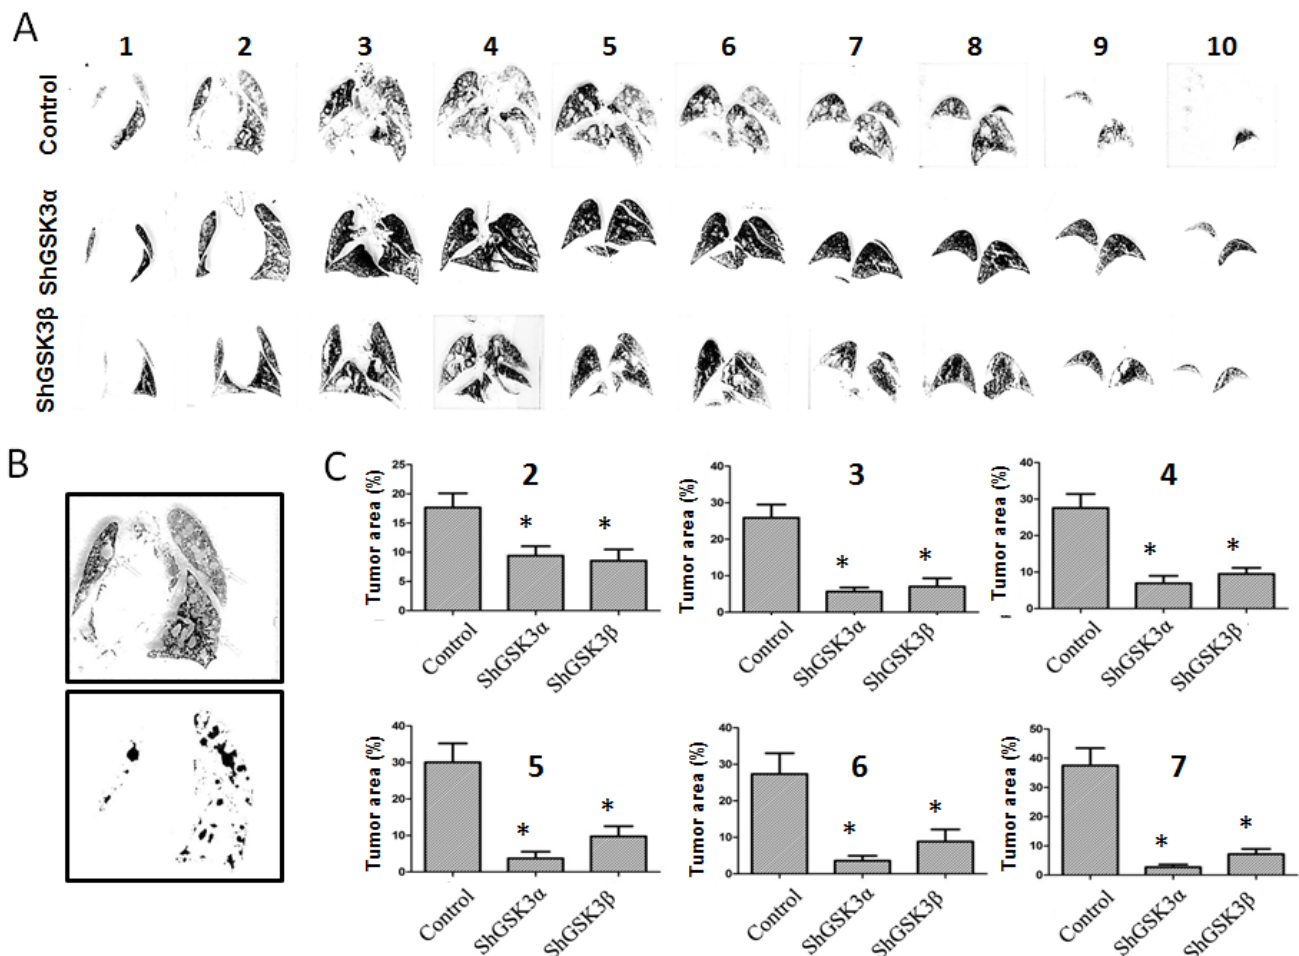

**Figure 6: GSK3 $\alpha$  gene silencing has improved therapeutic benefits as compared to GSK3 $\beta$  in inhibiting prostate cancer colonization to lungs.** (A) Figure showing serial sections of the lungs collected from athymic nude mice 16 days after intravenous (tail-vein) administration of PC3 cells expressing control, GSK3 $\alpha$  and GSK3 $\beta$  ShRNA and perfused with India ink to visualize the metastatic tumor nodules. (B) Figure showing image conversion using Image J software to clearly visualize and quantify metastasized tumor nodules in the lungs. (C) Bar graph showing the area of tumor growth in each lung serial sections collected 16 days after intravenous administration of PC3 cells expressing control, GSK3 $\alpha$  and GSK3 $\beta$  ShRNA showing the effect of GSK3 $\alpha$  and GSK3 $\beta$  gene knockdown on their ability to metastasize to the lungs (n=5). Data is shown as Mean + SD; \* $p$  < 0.01.

C). Due to this overlap, we subjected prostate cancer cells for cell scattering assay to specifically determine the role of each GSK3 isoform in EMT and motility. Our analysis indicated that upon plating equal number of ShControl, ShGSK3 $\alpha$  and ShGSK3 $\beta$  PC3, DU145 and LNCaP cells in comparable conditions, ShGSK3 $\beta$  cells, and not ShControl or ShGSK3 $\alpha$  PC3, DU145 and LNCaP cells exhibited the tendency to interact and aggregate each other, a reversal of EMT-mediated cell scattering. In contrast, more cell death and hence reduced number of plated cells was observed with GSK3 $\alpha$  gene silencing in PC3, DU145 and LNCaP cells. Thus, our study demonstrated that prostate cancer EMT, a pre-requisite for invasion and colonization is a predominant function of GSK3 $\beta$  isoform, and that the effect of GSK3 $\alpha$  on prostate cancer colonization may be secondary due to the increased apoptosis and reduced proliferation of prostate cancer cells.

## GSK3 $\beta$ gene silencing increases expression and membrane localization of $\beta$ -catenin

Since the effect of  $\beta$ -catenin on prostate cancer progression is more reliant on its intracellular localization in the nucleus, cytoplasm or on the membrane rather than its increased expression, we performed immunocytochemistry analysis of PC3 and DU145 prostate cancer cells. Our analysis indicated that in resting PC3 and DU145 cells,  $\beta$ -catenin is mostly present in the cytoplasm and the membrane with negligible amounts present in the nucleus (Figure 9A and C). Upon GSK3 $\beta$  gene silencing, expression of total  $\beta$ -catenin was significantly increased (Figure 9B and D). Interestingly, despite the increased  $\beta$ -catenin expression in ShGSK3 $\beta$  cells, its levels in the cytoplasm was reduced, and most of the  $\beta$ -catenin in the cells was localized on the membrane (Figure 9A and C), suggesting that GSK3 $\beta$ -mediated effect on the expression and localization of  $\beta$ -catenin is predominantly associated with barrier-junction signaling as compared to Wnt signaling.

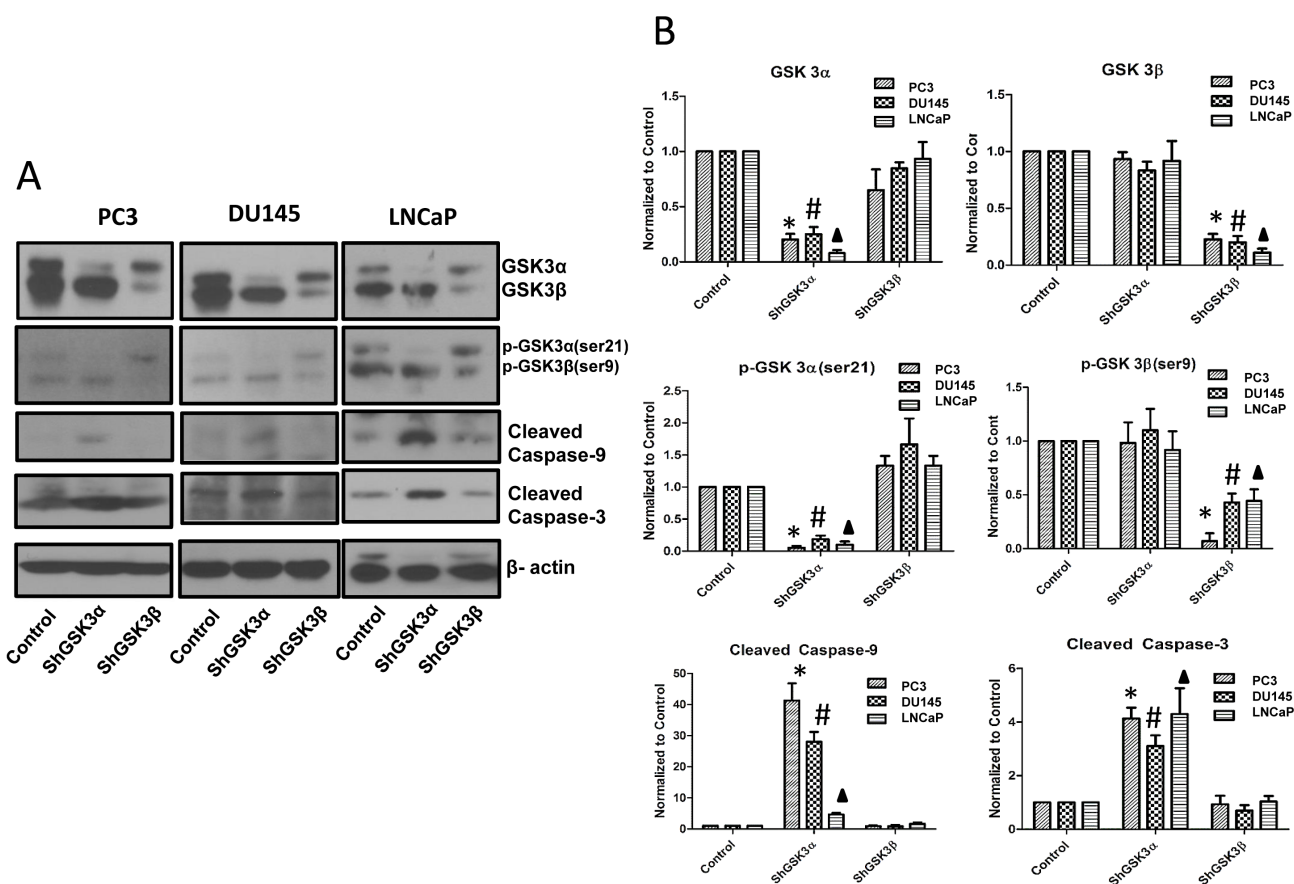

**Figure 7: GSK3 $\alpha$ , and not GSK3 $\beta$  regulates intrinsic caspase-3/9 dependent survival pathway in prostate cancer cells.** (A) Western blot images showing the effect of GSK3 $\alpha$  and GSK3 $\beta$  gene silencing in PC3 (left panel), DU145 (center panel) and LNCaP (right panel) cells on the levels of cleaved caspase-9 and cleaved caspase-3, important mediators of intrinsic apoptotic pathway. (B) Densitometry analysis of Western blot images showing the effect of GSK3 $\alpha$  and GSK3 $\beta$  gene silencing in PC3, DU145 and LNCaP cells on the levels of cleaved caspase-9 and cleaved caspase-3, along with phosphorylated and total levels of GSK3 $\alpha$  and GSK3 $\beta$  (n=3). Data is shown as Mean + SD; \*,#,#,▲p<0.05 for PC3, DU145 and LNCaP cells, respectively.



## DISCUSSION

Whereas the impact of GSK3 activity modulation in multiple cancers by itself is a major reason for controversy and concern among scientists, their presence in two different isoforms, likely modulating various cellular processes in a non-redundant manner further complicated the problem. Hence, we investigated both these facets of the GSK3 conundrum in early stage LNCaP and advanced stage PC3 and DU145 human prostate cancer cell lines on cellular function, tumor growth and micrometastasis. In the current manuscript, we provide novel insights on the isoform specific role of GSK3 $\alpha$  and GSK3 $\beta$  in prostate cancer cell proliferation, apoptosis, colony formation, motility and invasion *in vitro* as well as tumor growth and micrometastasis to lungs *in vivo* along with underlying molecular mechanisms.

Major focus of our laboratory is to understand the complex mechanisms by which Akt and its signaling

partners regulate prostate cancer cell function *in vitro*, and tumor growth, angiogenesis and metastasis *in vivo*. In pursuit of this goal, we have so far shown that Akt1, predominant Akt isoform in prostate cancer cells is integral for tumor growth [30-32] and invasion [33]. The importance of PTEN-Akt pathway in cancer [34-37], including prostate cancer [38-41] have also been indicated by other laboratories. Interestingly, we have also demonstrated that Akt1 pathway can negatively regulate tumor angiogenesis and vascular permeability [42] and that Akt-independent mechanism also does exist in prostate cancer cells leading to cell survival [43]. These reports clearly indicate the need to characterize the downstream signaling pathways modulated by Akt in many cancers, not only to unveil the reasons for such discrepancies, but also to help designing ways to pharmacologically modulate Akt activity or target its downstream effectors for prostate cancer therapy.

One of the best known, but the least characterized

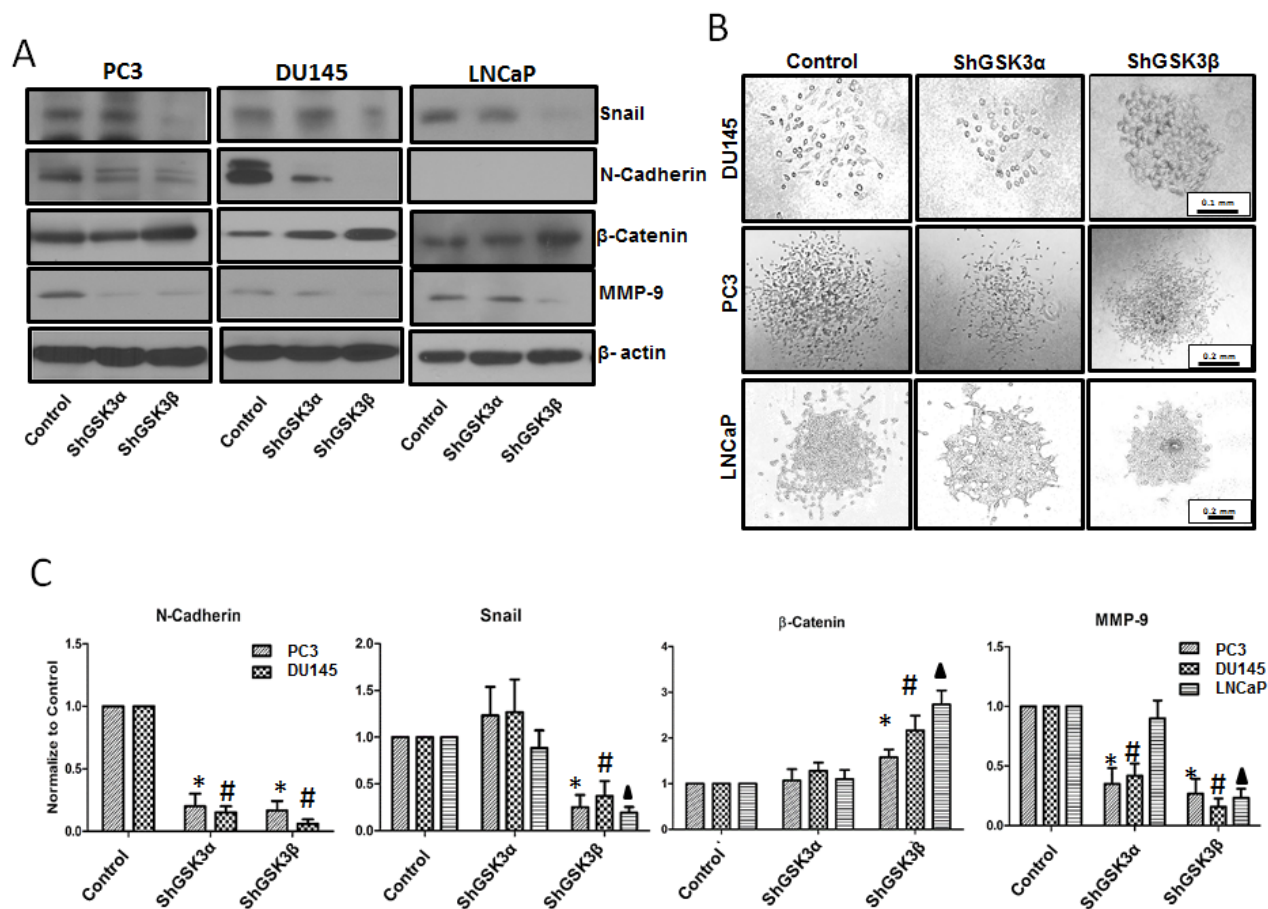

**Figure 8: GSK3 $\beta$  predominantly regulates prostate cancer epithelial-to-mesenchymal transition via a Snail/N-Cadherin/ $\beta$ -Catenin pathway.** (A) Western blot images showing the effect of GSK3 $\alpha$  and GSK3 $\beta$  gene silencing in PC3 (left panel), DU145 (center panel) and LNCaP (right panel) cells on the expression of epithelial and mesenchymal specific genes Snail, N-Cadherin,  $\beta$ -catenin and MMP-9. (B) Microscopic images of PC3 (upper panel), DU145 (center panel) and LNCaP (lower panel) cells displaying phenotypic changes between cobblestone-like epithelial morphology and typical mesenchymal-like morphology with silencing of GSK3 $\alpha$  and GSK3 $\beta$  gene expression as compared to control cells. (C) Densitometry analysis of Western blot images showing the effect of GSK3 $\alpha$  and GSK3 $\beta$  gene silencing in PC3, DU145 and LNCaP cells on the expression of Snail, N-Cadherin,  $\beta$ -catenin and MMP-9 (n=3). Data is shown as Mean + SD; \*, #,  $\blacktriangle$  p<0.05 for PC3, DU145 and LNCaP cells, respectively.

substrate of Akt is the two gene family of GSK3. Akt phosphorylates Serine 21 and Serine 9 in GSK3 $\alpha$  and GSK3 $\beta$ , respectively leading to their inactivation [5, 6]. Akt is a potent oncogene, and apart from inactivating mutations in PTEN, activating E17K mutations in Akt in prostate cancer cells have also demonstrated to promote prostate cancer [44]. Hence it was logical for the scientists to assume that prostate cancer cells may likely be more susceptible to pharmacological activation of GSK3 rather than its inhibition. Even though the earlier studies indicated occurrence of such a scenario in prostate cancer [24, 25], more recent studies indicated the opposite in multiple cancers [8-10, 13, 21, 22]. On one end, Wnt signaling triggered by Wnt ligand through frizzled is known to inhibit GSK3 $\beta$  thus stabilizing the  $\beta$ -catenin in the cytoplasm and its subsequent translocation to the nucleus [17]. Considering an oncogene, nuclear

translocation of  $\beta$ -catenin is assumed to promote tumor growth via transcriptional activation. On the other end,  $\beta$ -catenin is also an integral component of the epithelial adherens junctions (AJ) [17], which is beyond its role in Wnt signaling. In association with epithelial cadherins (E-cadherin),  $\beta$ -catenin stabilizes cell-cell contacts, thus maintaining the epithelial cell polarity [45]. The latter although stabilizes the  $\beta$ -catenin expression in prostate cancer cells, it does so by anchoring it on the membrane in epithelial AJs, thus preventing its entry into the nucleus as indicated in clinical samples [46]. During EMT in prostate cancer, reduced expression of E-cadherin will release the  $\beta$ -catenin for translocation into the nucleus [47, 48] for pro-oncogenic function. Even down-regulation of  $\beta$ -catenin expression has also been reported in prostate cancer [49, 50]. Our results is a perfect documentation supporting the latter scenario, where knocking down

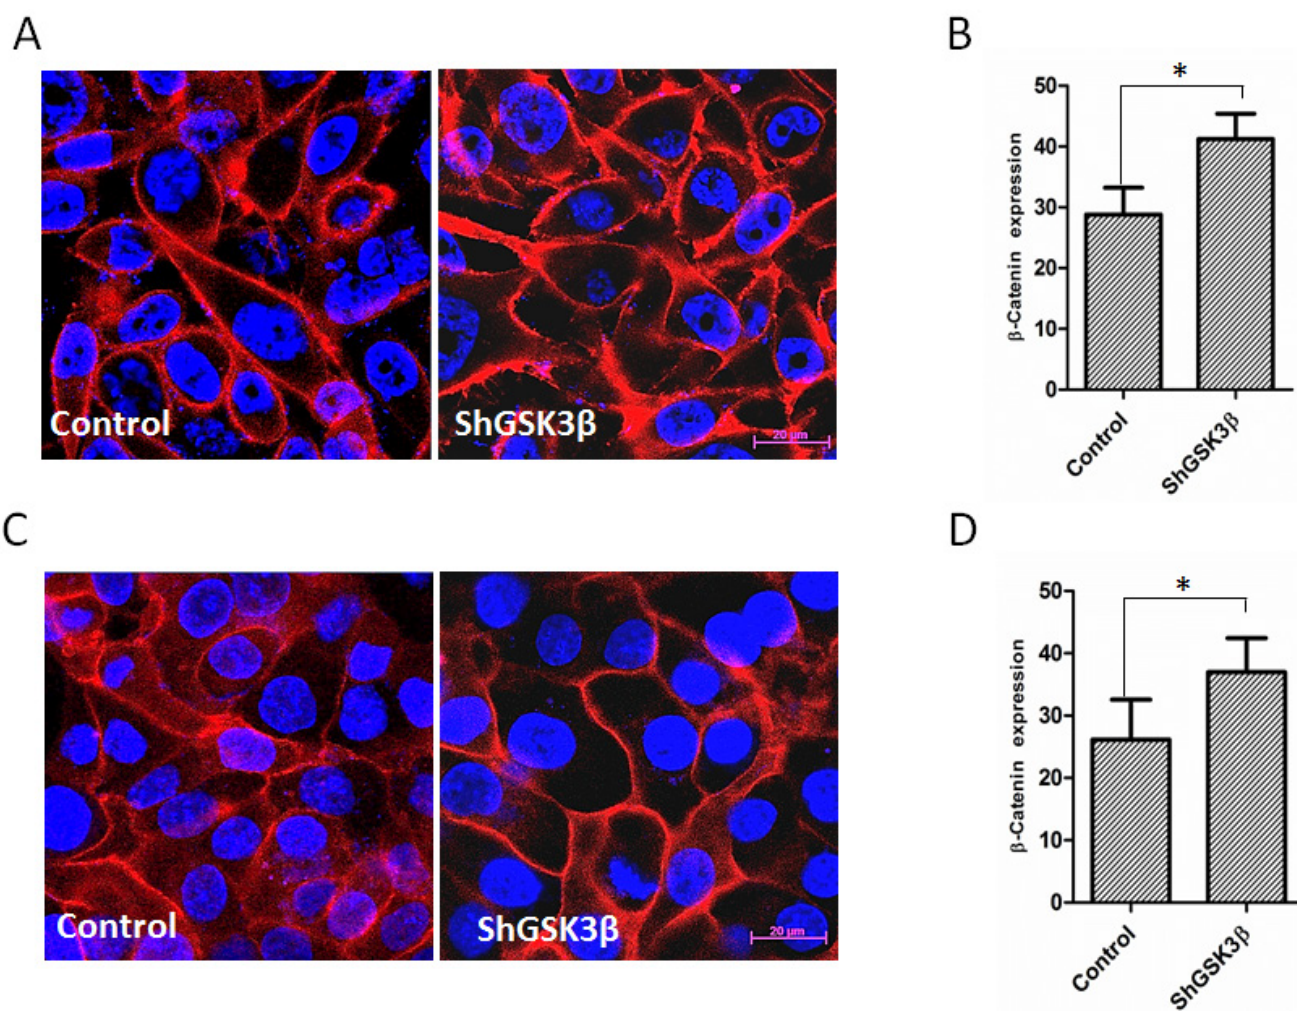

**Figure 9: GSK3 $\beta$  gene silencing results in increased expression and membrane localization of  $\beta$ -catenin.** (A) Fluorescent images on ShControl and ShGSK3 $\beta$  PC3 cells probed with anti- $\beta$ -catenin antibodies showing the intracellular localization of  $\beta$ -catenin in the presence of 10% FBS. (B) Quantification of the total expression of  $\beta$ -catenin in ShControl and ShGSK3 $\beta$  PC3 cells in optical density (OD) units as measured by the NIH Image J software. (C) Fluorescent images on ShControl and ShGSK3 $\beta$  DU145 cells probed with anti- $\beta$ -catenin antibodies showing the intracellular localization of  $\beta$ -catenin in the presence of 10% FBS. (D) Quantification of the total expression of  $\beta$ -catenin in ShControl and ShGSK3 $\beta$  DU145 cells as measured in OD units by the NIH Image J software (n=9). Data is shown as Mean + SD; \* $p$  < 0.01.

GSK3 $\beta$  results in the increased expression of  $\beta$ -catenin, increased cell-cell contacts, re-establishing epithelial cell polarity and reduced cell scattering associated with reduced expression of EMT markers, collectively resulting in the inhibition of cell motility, invasion and micrometastasis *in vitro* and *in vivo*.

Our previous study reported that GSK3 activation as a result of Src-mediated phosphorylation of GSK3 tyrosine 216 is necessary for prostate cancer cell function *in vitro*. We also demonstrated that the inhibition of prostate cancer Src activity by treatment with Src-Abl inhibitor Dasatinib resulted in the inhibition of GSK3 tyrosine 216 phosphorylation in prostate cancer cell lines subsequently inhibiting proliferation, survival and invasion *in vitro* and resulting in impaired tumor growth *in vivo* [13]. A number of reports since mid-2000 have also revealed GSK3 $\beta$  as a prostate cancer promoter [2], further demonstrating the importance of GSK3 $\beta$  in prostate cancer. Despite these confirmations, two most recent reports emanating from the same laboratory argues the effect of GSK3 $\beta$  activation on EMT in prostate cancer [51, 52]. These studies claim that growth factors such as EGF and bFGF induce EMT in prostate cancer cells via PKC and Akt-mediated inhibition of GSK3 $\beta$ , respectively [51, 52] showing increased phosphorylation of its Serine 9 residue upon EGF or bFGF stimulation. One drawback in this study is that the authors went on the assumption that serine 9 phosphorylated GSK3 $\beta$  is functionally inactive, and activity not determined through an enzymatic assay or phosphorylation of  $\beta$ -catenin, a known GSK3 $\beta$  substrate. On the other end, clinical analysis performed in the prostate cancer patient samples indicated that while GSK3 $\alpha$  and GSK3 $\beta$  expressions are highly elevated in the early and advanced stages of prostate cancer, respectively, expression of both the isoforms are significantly elevated in the advanced stages. This once again support our findings that GSK3 $\alpha$ -mediated cell survival and proliferation promotes tumor growth in both early and advanced stages, and that GSK3 $\beta$ / $\beta$ -catenin-mediated EMT promotes cell motility, invasion and micrometastasis in the advanced stages.

Intracellular  $\beta$ -catenin has multiple fates depending upon the stimuli and type of cells [17, 45]. Our data indicated that although expression of  $\beta$ -catenin was increased in ShGSK3 $\beta$  PC3 and DU145 cells compared to respective ShControl cells, its presence in the cytoplasm was reduced and its localization in the membrane was elevated. This indicated that in prostate cancer cells, GSK3 $\beta$  inhibition will lead to stabilization of cell-barrier inhibiting cell scattering and reversing EMT. Whereas most of the effect of GSK3 $\alpha$  knockdown on prostate cancer micrometastasis may come from the effect of GSK3 $\alpha$  deficiency on apoptosis and proliferation, a role for GSK3 $\alpha$  in EMT and micrometastasis cannot be ruled out based on the effect of GSK3 $\alpha$  gene knockdown on the expression of EMT markers such as N-cadherin and

MMP9. Nevertheless, we provide the first report on the isoform specific function of GSK3 $\alpha$  and GSK3 $\beta$  in the regulation of prostate cancer cell survival and proliferation, as well as EMT and micrometastasis, respectively. Thus, our study generates reasonable evidence to propose that targeting GSK3 can be an effective strategy to treat advanced stage prostate cancer.

## MATERIALS AND METHODS

### Animals

All animal procedures listed in this article were performed as per the protocol approved by the Institutional Animal Care and Use Committee at the Charlie Norwood Veterans Affairs Medical Center, Augusta, GA (ACORP# 09-07-011). All the efforts were made to minimize animal pain and suffering. Athymic nude mice necessary for the tumor xenograft and lung colonization experiments were purchased from Harlan Laboratories (Indianapolis, IN).

### Cell lines, reagents, and antibodies

Human PC3, DU145 and LNCaP cell lines were obtained from ATCC (Manassas, VA) and maintained in DMEM High Glucose (PC3 and DU145) or RPMI-1640 (LNCaP) (HyClone) with 10% fetal bovine serum (FBS), 100 units/ml penicillin, and 100  $\mu$ g/ml streptomycin in 5% CO<sub>2</sub> humidified atmosphere at 37°C. Primary antibodies against cleaved caspase-3, cleaved caspase-9, N-Cadherin, p-GSK3 Ser9/21,  $\beta$ -catenin and Snail were purchased from Cell Signaling (Boston, MA), and anti- $\beta$ -actin was from Sigma (St Louis, MO). Anti-mouse and anti-rabbit HRP conjugated secondary antibodies were obtained from BioRad (Hercules, CA). Human dermal microvascular endothelial cells (HMEC) were obtained from ATCC. Cells were maintained in Endothelial Cell Basal Medium-2 (Lonza) with Microvascular Endothelial Cell Growth Medium-2 Bullet Kit (Lonza). All cultures were maintained in a humidified 5% CO<sub>2</sub> incubator at 37°C, and routinely passaged when 80–90% confluent.

### Generation of ShGSK3 $\alpha$ and ShGSK3 $\beta$ stable PC3, DU145 and LNCaP cell lines

Cells were infected with lenti-virus particles in 6 well plates. Medium was changed a day prior to lentivirus infection. PC3, DU145 and LNCaP (70–80 % confluent) were infected with SMART vector 2.0 lentivirus particles (10<sup>9</sup> pfu) expressing ShGSK3 $\alpha$  or ShGSK3 $\beta$  (containing a mixture of 3 ShRNA targeting GSK3 $\alpha$  or GSK3 $\beta$  mRNA) or Non-targeting Control Particles (Dharmacon, Thermo Scientific). Lentivirus particles were mixed in

1ml SFM4Transfx-293 (Hyclone) and added along with 1  $\mu$ l Polybrene (10mg/ml, American bioanalytical). PC3, DU145 and LNCaP were then incubated for 16 h, following which medium was changed to complete DMEM. After 3 days following lentivirus infection, transfection efficiency was tested by looking into the percentage of cells expressing Turbo-GFP using Fluorescence microscope. Prostate cancer cells with stable silencing of ShGSK3 $\alpha$  or ShGSK3 $\beta$  gene (or stable expression of control non-coding ShRNA) were selected by treatment with 5  $\mu$ g/ml puromycin (Invitrogen) treatment. Stable cell lines thus prepared were then cultured in complete DMEM medium with 0.4  $\mu$ g/ml puromycin.

Electric cell-substrate impedance sensing (ECIS) assay for cancer cell microinvasion: Cancer cell transendothelial migration (microinvasion) was studied using the ability of cancer cells to penetrate the endothelial monolayer and thus disrupt the endothelial-barrier integrity (measured as electrical resistance of the endothelial monolayer) as determined using Electric Cell-substrate Impedance Sensing (ECIS) technology from Applied Biophysics (Troy, NY) [33, 53]. Briefly, HMEC were seeded in 1:1 density on gelatin-coated ECIS arrays (8W10E+), each containing 8 wells with 16 gold electrodes per well. Culture dishes were replenished with fresh medium 24 h after seeding and the experiments were started when the cells reach a monolayer. PC3, DU145 and LNCaP cells at a concentration of  $0.5 \times 10^5$ /well were added on top of the HMEC monolayer. The resistance values were measured at multiple frequencies mode.

### Cell proliferation assay

Prostate cancer cell proliferation was studied as previously described [54]. Briefly, 200  $\mu$ L of medium containing  $0.5 \times 10^4$  PC3, DU145 and  $1.0 \times 10^4$  LNCaP cells were seeded in each well of 96-well plates. On the second day, medium were removed and a 200  $\mu$ l of a new medium containing 0.5 mg/mL 3-(4,5-dimethylthiazole-2-yl)-2,5-diphenyltetrazolium bromide (MTT) were added to each well then incubated for 4 hours at 37  $^{\circ}$ C. Next, medium were removed, and 200  $\mu$ l of isopropanol per well was added to solubilize the crystalized formazan products. Absorbance at 570 nm was measured using an automated microplate spectrophotometer (ELX800, Biotek).

### Cell migration assay

Cancer cell migration was performed as previously standardized [55]. Briefly, PC3 and DU145 cells expressing control, GSK3 $\alpha$  or GSK3 $\beta$  ShRNA were plated in 12-well plates. Cells were grown on plates to reach confluence (approximately 16 h). Next, a scratch was made in the monolayer using 1 ml pipette tips and pictures were taken at 0 and 12 h. The cell migration (as

measured by scratch recovery) was calculated using the following equation  $(1 - T_t/T_0) \times 100$ , where  $T_t$  is the area at 12 h and  $T_0$  is the area at time zero.

### Ki67 staining

To detect ki67 positive cells in xenograft sections, immunohistochemistry was performed. Briefly, xenograft frozen sections were washed by PBS, incubated in 1% Triton X-100 for 15 min and then blocked in 1% BSA for 30 min. Primary antibodies against ki67 (Abcam, 1:100 dilution) was added and the slides were incubated overnight at 4 $^{\circ}$ C. Slides were washed three times in PBS for 10min. Secondary antibodies were added on to the slides and further incubated for another 1 hour. After 3 times washing in PBS for 10 min. each, slides were stained using DAB kit (Life Technology, Carlsbad, CA) to display the ki67 positive cells stained in brown color.

### Foci (colony) formation assay

Colony formation assay was performed as explained previously [56]. Briefly, equal numbers of PC3, DU145 and LNCaP cells expressing control, GSK3 $\alpha$  or GSK3 $\beta$  ShRNA were plated on 6-well plates and incubated in the presence of 10% FBS. After 10 days (20 days in case of LNCaP) under culture conditions, cells were stained with 5% methylene blue (Sigma, St. Louis, MO) in 50% ethanol for 10 min. Colonies of >50 cells were counted.

### Terminal deoxynucleotidyl transferase-mediated dUTP nick end labeling (TUNEL) assay

TUNEL assay for the *in situ* detection of apoptosis was performed using the ApopTag $^{\text{®}}$  Red In Situ Apoptosis detection kit (Millipore, MA) according to the manufacturer's instructions. Frozen nude mouse prostate tumor (PC3) xenograft sections were also processed accordingly. Nuclei were counterstained with DAPI. Tissue sections were analyzed for apoptotic cells with localized fluorescence using an inverted fluorescence microscope (Zeiss Axiovert100M, Carl Zeiss, Germany).

### Immunocytochemistry fluorescence staining

For immunofluorescence staining of prostate cancer cells, PC3 and DU145 cells were seeded on to the cell culture chambers, washed two times with PBS, then fixed cells using 4% paraformaldehyde for 20 min. Cells were then incubated with 0.1 % Triton X-100 for 15 min. Cell sections were blocked by 1% BSA, incubated with  $\beta$ -catenin antibodies (1:100) at 4  $^{\circ}$ C overnight. Immunofluorescence was revealed using Alexa-594 anti-mouse secondary antibodies (1:2000). Cells sections were

mounted in fluorescence mounting medium (Vectashield, Vector Laboratories, Burlingame, CA). Samples were observed under a confocal microscope equipped with argon and helio/neon lasers (LSM510, Germany). Controls were performed by omitting either one or both primary antibodies.

### Western blot analysis

Prostate cancer cells were washed twice with PBS and protein was extracted using RIPA buffer (containing 1% Triton X 100, 150 mM NaCl and 50mM Tris buffer, pH 7.4) containing protease and phosphatase inhibitor cocktails (Roche). Proteins were separated by 8-12 % SDS-PAGE gel, and then transferred onto PVDF membrane as described previously [57]. Blotted membranes were blocked with 5 % milk for regular proteins or 5 % BSA for phosphorylated antibodies, and densitometry data as measured using NIH Image J software was normalized with  $\beta$ -actin loading control (Sigma, St Louis, MO).

### *In vivo* nude mouse tumor xenograft model

Stable transfected control, GSK3 $\alpha$  or GSK3 $\beta$  ShRNA PC3 cells were grown to confluence in 75-ml flasks. Cells were re-suspended in PBS, counted and equal number of cells ( $1 \times 10^6$ ) was injected subcutaneously in 7- to 8-week-old nude mice (athymic nude mice; Harlan, Indianapolis, IN). Mice were sacrificed on day 16, and tumors were dissected, weighed, and tissues were fixed in 4% PFA for immunohistochemistry analysis.

### *In vivo* mouse model of prostate cancer colonization to lungs

Eight-week old nude mice (athymic nude mice; Harlan, Indianapolis, IN) were divided into three groups for the administration of PC3 cells expressing control, GSK3 $\alpha$  or GSK3 $\beta$  ShRNA. Cells ( $0.5 \times 10^6$ ) suspended in normal saline were injected to each group of mice separately via tail vein. In all the experiments mice were evaluated for the presence of metastases 16 days after cell administration. 1.5 ml of 15% India-ink solution was injected intratracheally to stain the lungs and visualize non-stained the tumor nodules. Stained lungs were carefully resected and rinsed in Fekete's solution (300 mL 70% ethanol, 30 mL 37% formaldehyde, 5 mL glacial acetic acid), then placed in fresh Fekete's solution overnight. The whole lungs were harvested for the counting of tumor nodules. Following this, mice lungs were subjected for equal interval cross section (2mm) analysis for PC3 cell colonization to the lung tissues. Tumor area was measured using the NIH Image J software.

### Statistical analysis

All the data are presented as Mean + SD and were calculated from multiple independent experiments. The Student's two-tailed *t* test or ANOVA were used to determine significant differences between treatment and control values using the GraphPad Prism 4.03 software. Data with *p* value < 0.05 was considered significant, and are marked with symbols wherever data are statistically significant.

### ACKNOWLEDGEMENTS

Funds were provided by the University of Georgia College of Pharmacy Dean's Foundation Funds and in part by the National Institutes of Health grant (R01HL103952) to PRS. Al-Azayzih was supported by pre-doctoral fellowship from Jordan University of Science and Technology. This material is the result of work supported with resources and the use of facilities at the Charlie Norwood VAMC, Augusta, GA. The funders had no role in the study design, data collection, analysis and decision to publish. Preparation of the manuscript and the contents do not represent the views of the Department of Veterans Affairs or the United States Government.

### REFERENCES

1. Somanath PR, Razorenova OV, Chen J and Byzova TV. Akt1 in endothelial cell and angiogenesis. *Cell cycle*. 2006; 5(5):512-518.
2. McCubrey JA, Steelman LS, Bertrand FE, Davis NM, Sokolosky M, Abrams SL, Montalto G, D'Assoro AB, Libra M, Nicoletti F, Maestro R, Basecke J, Rakus D, Gizak A, Demidenko ZN, Cocco L, et al. GSK-3 as potential target for therapeutic intervention in cancer. *Oncotarget*. 2014; 5(10):2881-2911.
3. Somanath PR, Vijai J, Kichina JV, Byzova T and Kandel ES. The role of PAK-1 in activation of MAP kinase cascade and oncogenic transformation by Akt. *Oncogene*. 2009; 28(25):2365-2369.
4. Martini M, De Santis MC, Braccini L, Gulluni F and Hirsch E. PI3K/AKT signaling pathway and cancer: an updated review. *Annals of medicine*. 2014; 46(6):372-383.
5. Shaw M, Cohen P and Alessi DR. Further evidence that the inhibition of glycogen synthase kinase-3beta by IGF-1 is mediated by PDK1/PKB-induced phosphorylation of Ser-9 and not by dephosphorylation of Tyr-216. *FEBS letters*. 1997; 416(3):307-311.
6. ter Haar E, Coll JT, Austen DA, Hsiao HM, Swenson L and Jain J. Structure of GSK3beta reveals a primed phosphorylation mechanism. *Nature structural biology*. 2001; 8(7):593-596.
7. Wilson W, 3rd and Baldwin AS. Maintenance of

constitutive IkappaB kinase activity by glycogen synthase kinase-3alpha/beta in pancreatic cancer. *Cancer research*. 2008; 68(19):8156-8163.

8. Mishra R. Glycogen synthase kinase 3 beta: can it be a target for oral cancer. *Molecular cancer*. 2010; 9:144.
9. Rensing Rix LL, Kuenzi BM, Luo Y, Remily-Wood E, Kinose F, Wright G, Li J, Koomen JM, Haura EB, Lawrence HR and Rix U. GSK3 alpha and beta are new functionally relevant targets of tivantinib in lung cancer cells. *ACS chemical biology*. 2014; 9(2):353-358.
10. Bang D, Wilson W, Ryan M, Yeh JJ and Baldwin AS. GSK-3alpha promotes oncogenic KRAS function in pancreatic cancer via TAK1-TAB stabilization and regulation of noncanonical NF-kappaB. *Cancer discovery*. 2013; 3(6):690-703.
11. Carotenuto M, De Antonellis P, Liguori L, Benvenuto G, Magliulo D, Alonzi A, Turino C, Attanasio C, Damiani V, Bello AM, Vitiello F, Pasquinelli R, Terracciano L, Federico A, Fusco A, Freeman J, et al. H-Prune through GSK-3beta interaction sustains canonical WNT/beta-catenin signaling enhancing cancer progression in NSCLC. *Oncotarget*. 2014; 5(14):5736-5749.
12. Zhang J, Wei J, Lu J, Tong Z, Liao B, Yu B, Zheng F, Huang X, Chen Z, Fang Y, Li B, Chen W, Xie D and Luo J. Overexpression of Rab25 contributes to metastasis of bladder cancer through induction of epithelial-mesenchymal transition and activation of Akt/GSK-3beta/Snail signaling. *Carcinogenesis*. 2013; 34(10):2401-2408.
13. Goc A, Al-Husein B, Katsanevas K, Steinbach A, Lou U, Sabbineni H, DeRemer DL and Somanath PR. Targeting Src-mediated Tyr216 phosphorylation and activation of GSK-3 in prostate cancer cells inhibit prostate cancer progression *in vitro* and *in vivo*. *Oncotarget*. 2014; 5(3):775-787.
14. Patel S and Woodgett J. Glycogen synthase kinase-3 and cancer: good cop, bad cop? *Cancer cell*. 2008; 14(5):351-353.
15. Woodgett JR. Molecular cloning and expression of glycogen synthase kinase-3/factor A. *The EMBO journal*. 1990; 9(8):2431-2438.
16. Doble BW and Woodgett JR. GSK-3: tricks of the trade for a multi-tasking kinase. *Journal of cell science*. 2003; 116(Pt 7):1175-1186.
17. Wu D and Pan W. GSK3: a multifaceted kinase in Wnt signaling. *Trends in biochemical sciences*. 2010; 35(3):161-168.
18. Kaidanovich-Beilin O, Lipina TV, Takao K, van Eede M, Hattori S, Laliberte C, Khan M, Okamoto K, Chambers JW, Fletcher PJ, MacAulay K, Doble BW, Henkelman M, Miyakawa T, Roder J and Woodgett JR. Abnormalities in brain structure and behavior in GSK-3alpha mutant mice. *Molecular brain*. 2009; 2:35.
19. Hoefflich KP, Luo J, Rubie EA, Tsao MS, Jin O and Woodgett JR. Requirement for glycogen synthase kinase-3beta in cell survival and NF-kappaB activation. *Nature*. 2000; 406(6791):86-90.
20. Somanath PR, Jack SL and Vijayaraghavan S. Changes in sperm glycogen synthase kinase-3 serine phosphorylation and activity accompany motility initiation and stimulation. *Journal of andrology*. 2004; 25(4):605-617.
21. Fu Y, Wang X, Cheng X, Ye F, Xie X and Lu W. Clinicopathological and biological significance of aberrant activation of glycogen synthase kinase-3 in ovarian cancer. *OncoTargets and therapy*. 2014; 7:1159-1168.
22. Zeng J, Liu D, Qiu Z, Huang Y, Chen B, Wang L, Xu H, Huang N, Liu L and Li W. GSK3beta overexpression indicates poor prognosis and its inhibition reduces cell proliferation and survival of non-small cell lung cancer cells. *PloS one*. 2014; 9(3):e91231.
23. Pak C and Miyamoto S. A new alpha in line between KRAS and NF-kappaB activation? *Cancer discovery*. 2013; 3(6):613-615.
24. Wang L, Lin HK, Hu YC, Xie S, Yang L and Chang C. Suppression of androgen receptor-mediated transactivation and cell growth by the glycogen synthase kinase 3 beta in prostate cells. *The Journal of biological chemistry*. 2004; 279(31):32444-32452.
25. Salas TR, Kim J, Vakar-Lopez F, Sabichi AL, Troncoso P, Jenster G, Kikuchi A, Chen SY, Shemshedini L, Suraokar M, Logothetis CJ, DiGiovanni J, Lippman SM and Menter DG. Glycogen synthase kinase-3 beta is involved in the phosphorylation and suppression of androgen receptor activity. *The Journal of biological chemistry*. 2004; 279(18):19191-19200.
26. Liao X, Thrasher JB, Holzbeierlein J, Stanley S and Li B. Glycogen synthase kinase-3beta activity is required for androgen-stimulated gene expression in prostate cancer. *Endocrinology*. 2004; 145(6):2941-2949.
27. Rinnab L, Schutz SV, Diesch J, Schmid E, Kufer R, Hautmann RE, Spindler KD and Cronauer MV. Inhibition of glycogen synthase kinase-3 in androgen-responsive prostate cancer cell lines: are GSK inhibitors therapeutically useful? *Neoplasia*. 2008; 10(6):624-634.
28. Darrington RS, Campa VM, Walker MM, Bengoa-Vergniory N, Gorrone-Etxebarria I, Uysal-Onganer P, Kawano Y, Waxman J and Kypta RM. Distinct expression and activity of GSK-3alpha and GSK-3beta in prostate cancer. *International journal of cancer Journal international du cancer*. 2012; 131(6):E872-883.
29. Liu K, Caldwell SA and Abrams SI. Cooperative disengagement of Fas and intercellular adhesion molecule-1 function in neoplastic cells confers enhanced colonization efficiency. *Cancer research*. 2005; 65(3):1045-1054.
30. Goc A, Kochuparambil ST, Al-Husein B, Al-Azayzih A, Mohammad S and Somanath PR. Simultaneous modulation of the intrinsic and extrinsic pathways by simvastatin in mediating prostate cancer cell apoptosis. *BMC cancer*. 2012; 12:409.

31. Goc A, Choudhary M, Byzova TV and Somanath PR. TGFbeta- and bleomycin-induced extracellular matrix synthesis is mediated through Akt and mammalian target of rapamycin (mTOR). *Journal of cellular physiology*. 2011; 226(11):3004-3013.
32. Goc A, Al-Husein B, Kochuparambil ST, Liu J, Heston WW and Somanath PR. PI3 kinase integrates Akt and MAP kinase signaling pathways in the regulation of prostate cancer. *International journal of oncology*. 2011; 38(1):267-277.
33. Goc A, Liu J, Byzova TV and Somanath PR. Akt1 mediates prostate cancer cell microinvasion and chemotaxis to metastatic stimuli via integrin beta(3) affinity modulation. *British journal of cancer*. 2012; 107(4):713-723.
34. Rasheed BK, Stenzel TT, McLendon RE, Parsons R, Friedman AH, Friedman HS, Bigner DD and Bigner SH. PTEN gene mutations are seen in high-grade but not in low-grade gliomas. *Cancer research*. 1997; 57(19):4187-4190.
35. Steck PA, Pershouse MA, Jasser SA, Yung WK, Lin H, Ligon AH, Langford LA, Baumgard ML, Hattier T, Davis T, Frye C, Hu R, Swedlund B, Teng DH and Tavtigian SV. Identification of a candidate tumour suppressor gene, MMAC1, at chromosome 10q23.3 that is mutated in multiple advanced cancers. *Nature genetics*. 1997; 15(4):356-362.
36. Cairns P, Okami K, Halachmi S, Halachmi N, Esteller M, Herman JG, Jen J, Isaacs WB, Bova GS and Sidransky D. Frequent inactivation of PTEN/MMAC1 in primary prostate cancer. *Cancer research*. 1997; 57(22):4997-5000.
37. Podsypanina K, Ellenson LH, Nemes A, Gu J, Tamura M, Yamada KM, Cordon-Cardo C, Cattoretti G, Fisher PE and Parsons R. Mutation of Pten/Mmac1 in mice causes neoplasia in multiple organ systems. *Proceedings of the National Academy of Sciences of the United States of America*. 1999; 96(4):1563-1568.
38. Li J, Yen C, Liaw D, Podsypanina K, Bose S, Wang SI, Puc J, Miliareis C, Rodgers L, McCombie R, Bigner SH, Giovannella BC, Ittmann M, Tycko B, Hibshoosh H, Wigler MH, et al. PTEN, a putative protein tyrosine phosphatase gene mutated in human brain, breast, and prostate cancer. *Science*. 1997; 275(5308):1943-1947.
39. Vignarajan S, Xie C, Yao M, Sun Y, Simanainen U, Sved P, Liu T and Dong Q. Loss of PTEN stabilizes the lipid modifying enzyme cytosolic phospholipase A(2)alpha via AKT in prostate cancer cells. *Oncotarget*. 2014; 5(15):6289-6299.
40. Kwabi-Addo B, Giri D, Schmidt K, Podsypanina K, Parsons R, Greenberg N and Ittmann M. Haploinsufficiency of the Pten tumor suppressor gene promotes prostate cancer progression. *Proceedings of the National Academy of Sciences of the United States of America*. 2001; 98(20):11563-11568.
41. Trotman LC, Niki M, Dotan ZA, Koutcher JA, Di Cristofano A, Xiao A, Khoo AS, Roy-Burman P, Greenberg NM, Van Dyke T, Cordon-Cardo C and Pandolfi PP. Pten dose dictates cancer progression in the prostate. *PLoS biology*. 2003; 1(3):E59.
42. Chen J, Somanath PR, Razorenova O, Chen WS, Hay N, Bornstein P and Byzova TV. Akt1 regulates pathological angiogenesis, vascular maturation and permeability *in vivo*. *Nature medicine*. 2005; 11(11):1188-1196.
43. Al-Azayzih A, Gao F, Goc A and Somanath PR. TGFbeta1 induces apoptosis in invasive prostate cancer and bladder cancer cells via Akt-independent, p38 MAPK and JNK/SAPK-mediated activation of caspases. *Biochemical and biophysical research communications*. 2012; 427(1):165-170.
44. Boormans JL, Korsten H, Ziel-van der Made AC, van Leenders GJ, Verhagen PC and Trapman J. E17K substitution in AKT1 in prostate cancer. *British journal of cancer*. 2010; 102(10):1491-1494.
45. Fagotto F. Looking beyond the Wnt pathway for the deep nature of beta-catenin. *EMBO reports*. 2013; 14(5):422-433.
46. Lazari P, Poulias H, Gakiopoulou H, Thomopoulou GH, Barbatis C and Lazaris AC. Differential immunohistochemical expression of CD44s, E-cadherin and beta-catenin among hyperplastic and neoplastic lesions of the prostate gland. *Urologia internationalis*. 2013; 90(1):109-116.
47. Kim H, He Y, Yang I, Zeng Y, Kim Y, Seo YW, Murnane MJ, Jung C, Lee JH, Min JJ, Kwon DD, Kim KK, Lu Q and Kim K. delta-Catenin promotes E-cadherin processing and activates beta-catenin-mediated signaling: implications on human prostate cancer progression. *Biochimica et biophysica acta*. 2012; 1822(4):509-521.
48. Whitaker HC, Girling J, Warren AY, Leung H, Mills IG and Neal DE. Alterations in beta-catenin expression and localization in prostate cancer. *The Prostate*. 2008; 68(11):1196-1205.
49. Lee J, Ju J, Park S, Hong SJ and Yoon S. Inhibition of IGF-1 signaling by genistein: modulation of E-cadherin expression and downregulation of beta-catenin signaling in hormone refractory PC-3 prostate cancer cells. *Nutrition and cancer*. 2012; 64(1):153-162.
50. Pontes J, Jr., Srougi M, Borra PM, Dall'Oglio MF, Ribeiro-Filho LA and Leite KR. E-cadherin and beta-catenin loss of expression related to bone metastasis in prostate cancer. *Applied immunohistochemistry & molecular morphology : AIMM / official publication of the Society for Applied Immunohistochemistry*. 2010; 18(2):179-184.
51. Liu ZC, Wang HS, Zhang G, Liu H, Chen XH, Zhang F, Chen DY, Cai SH and Du J. AKT/GSK-3beta regulates stability and transcription of snail which is crucial for bFGF-induced epithelial-mesenchymal transition of prostate cancer cells. *Biochimica et biophysica acta*. 2014; 1840(10):3096-3105.
52. Liu ZC, Chen XH, Song HX, Wang HS, Zhang G, Wang H, Chen DY, Fang R, Liu H, Cai SH and Du J. Snail regulated

by PKC/GSK-3 $\beta$  pathway is crucial for EGF-induced epithelial-mesenchymal transition (EMT) of cancer cells. *Cell and tissue research*. 2014.

53. Goc A, Al-Azayzih A, Abdalla M, Al-Husein B, Kavuri S, Lee J, Moses K and Somanath PR. P21 activated kinase-1 (Pak1) promotes prostate tumor growth and microinvasion via inhibition of transforming growth factor beta expression and enhanced matrix metalloproteinase 9 secretion. *The Journal of biological chemistry*. 2013; 288(5):3025-3035.
54. Scudiero DA, Shoemaker RH, Paull KD, Monks A, Tierney S, Nofziger TH, Currens MJ, Seniff D and Boyd MR. Evaluation of a soluble tetrazolium/formazan assay for cell growth and drug sensitivity in culture using human and other tumor cell lines. *Cancer research*. 1988; 48(17):4827-4833.
55. Goc A, Abdalla M, Al-Azayzih A and Somanath PR. Rac1 activation driven by 14-3-3 $\zeta$  dimerization promotes prostate cancer cell-matrix interactions, motility and transendothelial migration. *PloS one*. 2012; 7(7):e40594.
56. Kochuparambil ST, Al-Husein B, Goc A, Soliman S and Somanath PR. Anticancer efficacy of simvastatin on prostate cancer cells and tumor xenografts is associated with inhibition of Akt and reduced prostate-specific antigen expression. *The Journal of pharmacology and experimental therapeutics*. 2011; 336(2):496-505.
57. Abdalla M, Goc A, Segar L and Somanath PR. Akt1 mediates alpha-smooth muscle actin expression and myofibroblast differentiation via myocardin and serum response factor. *The Journal of biological chemistry*. 2013; 288(46):33483-33493.
